# Supplementary material
Source: HighWire-hosted journal article supplement (http://ajnr-stage2.highwire.org/highwire/filestream/52711/field_highwire_adjunct_files/0/4401_figure.pdf)
Supplement: 4401_figure.pdf [file 4401_figure.pdf]

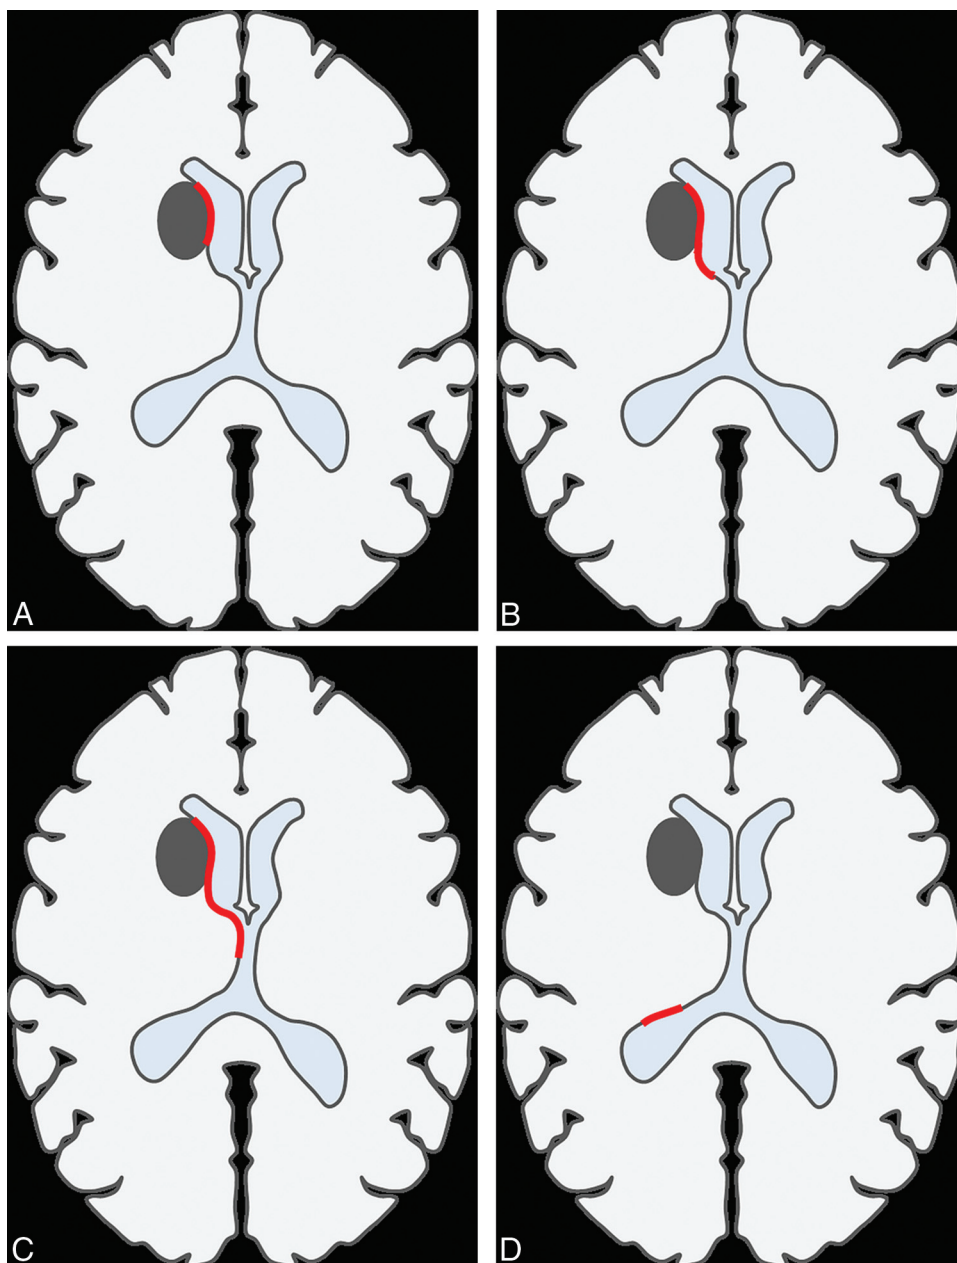

**ON-LINE FIG1.** Schematic drawings of the 4 patterns of subependymal enhancement. *A*, Type I: enhancement at the ependymal lining abutting the newly developed or enlarged measurable contrast-enhancing lesion. *B*, Type II: enhancement extending along the ventricular margin with the distance of extension (ie, distance from the margin of the enhancing lesion to the farthest end of the subependymal enhancement) measuring  $\leq 1$  cm. *C*, Type III: enhancement extending along the ventricular margin with the distance of extension measuring  $> 1$  cm. *D*, Type IV: enhancement at the ependymal lining isolated from the enhancing lesion. The gray-colored ovoid mass and the red-colored line represent the enhancing parenchymal lesion and subependymal enhancement, respectively.
